# Supplementary material
Source: Research Square preprint supplement (doi:10.21203/rs.3.rs-9569530/v1)
Supplement: Supplementary file 1 [file 20dbe8d032125055853be9cd.xlsx]

## Sheet: Table_S2_TP53_Cases
Case	Age	Sex	WHO 2022	ICC 2022	Concordant	TP53 Mutation(s)	N Mutations	Max VAF (%)	Biallelic Status	Method of Biallelic Assessment	Meets ICC VAF≥10%	Revised ICC (VAF≥10% applied)	Cytogenetics	BM Blast (%)	Hb (g/dL)	PLT (×10⁹/L)	IPSS-R Score	IPSS-R Risk
36	71	M	MDS-RS	MDS-TP53	No	c.1146delA	1	0.52	Single-hit	Single mutation, VAF 0.52%	No	MDS-RS (reverts to morphology)	Normal	0	8.6	150	2.0	Low
48	68	M	MDS-LB	MDS-TP53	No	c.659A>G	1	35	Single-hit	Single mutation, VAF 35.0%	Yes	MDS-TP53	Normal		9.8	12	N/A	N/A
49	57	F	MDS-TP53-Bi	MDS-TP53-Bi	Yes	c.392A>T; c.578A>G; c.708C>A; c.742C>T	4	50	Biallelic (multihit)	4 distinct TP53 mutations	Yes	MDS-TP53-Bi	5qdel, 7qdel	10	11.3	80	6.0	High
50	27	F	MDS-MLD	MDS-TP53	No	c.817C>T	1	4.15	Single-hit	Single mutation, VAF 4.15%	No	MDS-MLD (reverts to morphology)	Normal	2	9.7	147	2.0	Low
57	65	F	MDS-IB1	MDS-TP53	No	c.818G>A	1	14	Single-hit	Single mutation, VAF 14.0%	Yes	MDS-TP53	Normal	5	6.9	115	4.5	Intermediate
61	81	M	MDS-TP53-Bi	MDS-TP53-Bi	Yes	c.742C>T	1	80	Biallelic (presumptive LOH)	Single mutation, VAF 80.0% (>50% → LOH)	Yes	MDS-TP53-Bi	N/A	2	10.7	158	N/A	N/A
64	77	F	MDS-TP53-Bi	MDS-TP53-Bi	Yes	c.215C>G	1	99	Biallelic (presumptive LOH)	Single mutation, VAF 99.0% (>50% → LOH)	Yes	MDS-TP53-Bi	N/A	2	10.6	336	N/A	N/A
69	56	F	MDS-MLD	MDS-TP53	No	c.1146delA	1	1.15	Single-hit	Single mutation, VAF 1.15%	No	MDS-MLD (reverts to morphology)	8 kazanımı		7.2	5	N/A	N/A
70	75	F	MDS-TP53-Bi	MDS-TP53-Bi	Yes	c.533A>C; c.659A>G; c.742C>T; c.755T>C; c.818G>A; c.830G>T	6	9.5	Biallelic (multihit)	6 distinct TP53 mutations	No	MDS-TP53-Bi	5qdel	3	9.6	80	3.5	Intermediate
71	66	F	MDS-TP53-Bi	MDS-TP53-Bi	Yes	c.742C>T	1	78	Biallelic (presumptive LOH)	Single mutation, VAF 78.0% (>50% → LOH)	Yes	MDS-TP53-Bi	Normal	5	9.6	52.2	4.5	Intermediate

## Sheet: Table_S3_CrossTab
WHO 2022 \ ICC 2022	MDS-SLD	MDS-MLD	MDS-RS	MDS-IB	MDS-TP53	MDS-TP53-Bi	CMML-1	CMML-2	MDS/MPN, NOS	MDS/MPN-T-SF3B1	Total
MDS-SLD	2										2
MDS-MLD		13			2						15
MDS-RS			6		1						7
MDS-LB					1						1
MDS-IB1				3	1						4
MDS-TP53-Bi						5					5
CMML-1							18				18
CMML-2								7			7
MDS/MPN, NOS									9		9
MDS/MPN-T-SF3B1										3	3
Total	2	13	6	3	5	5	18	7	9	3	71

## Sheet: Table_S4_IPSS_R
Case	Age	Sex	WHO 2022	Hb (g/dL)	PLT (×10⁹/L)	ANC (×10⁹/L)	BM Blast (%)	Cytogenetics	Cyto Risk	IPSS-R Score	IPSS-R Risk	Key Mutations	TP53 Status
23	75	F	MDS-MLD	17.6	12	1.15	0	Normal	Good	2.0	Low	DNMT3A	WT
34	63	F	MDS-RS	7.8	422	3.07	2	Normal	Good	2.5	Low	SF3B1, EZH2, TET2	WT
35	70	M	MDS-MLD	6.0	34	1.32	2	Normal	Good	3.5	Intermediate	ASXL1, NF1	WT
36	71	M	MDS-RS	8.6	150	3.19	0	Normal	Good	2.0	Low	SF3B1, TP53, ASXL1, DNMT3A, NF1	Single-hit (VAF 0.52%)
37	46	F	MDS-RS	6.6	440	2.86	0	Normal	Good	2.5	Low	SF3B1, NF1	WT
38	68	M	MDS-MLD	8.5	806	3.99	10	Normal	Good	4.0	Intermediate	EZH2, DNMT3A, STAG2	WT
39	30	M	MDS-RS	8.2	18	0.35	12	Normal	Good	6.5	Very High	SF3B1, NRAS	WT
40	47	M	MDS-MLD	12.9	54	0.53	2	Normal	Good	2.0	Low	None	WT
42	79	F	MDS-MLD	8.9	209	6.06	0	Normal	Good	2.0	Low	ASXL1, RUNX1, U2AF1, IDH1	WT
44	79	F	MDS-MLD	7.7	191	2.99	3	Normal	Good	3.5	Intermediate	TET2, NRAS	WT
45	64	M	MDS-SLD	9.9	205	2.12	0	17del	Intermediate	3.0	Low	U2AF1, DNMT3A	WT
46	72	F	MDS-MLD	8.3	72	0.70	14	Normal	Good	6.0	High	ASXL1, IDH2	WT
47	29	M	MDS-RS	8.0	11	1.10	0	Normal	Good	3.0	Low	TET2	WT
48	68	M	MDS-LB	9.8	12	2.33	N/A	Normal	Good	N/A	N/A	TP53, NF1	Single-hit (VAF 35.0%)
49	57	F	MDS-TP53-Bi	11.3	80	0.73	10	5qdel, 7qdel	Poor	6.0	High	TP53	Multihit (biallelic)
50	27	F	MDS-MLD	9.7	147	2.38	2	Normal	Good	2.0	Low	TP53, EZH2, DNMT3A	Single-hit (VAF 4.15%)
51	82	F	MDS-IB1	7.8	824	4.28	6	Normal	Good	4.5	Intermediate	SF3B1, EZH2	WT
52	23	M	MDS-MLD	8.8	22	0.93	2	Normal	Good	3.0	Low	STAG2	WT
53	71	F	MDS-RS	9.9	371	11.75	0	9der	Intermediate	3.0	Low	SF3B1, CBL	WT
55	71	M	MDS-RS	8.1	590	4.25	1	Ydel	Very Good	1.0	Very Low	SF3B1, TET2	WT
57	65	F	MDS-IB1	6.9	115	1.37	5	Normal	Good	4.5	Intermediate	SF3B1, TP53, TET2	Single-hit (VAF 14.0%)
58	69	F	MDS-MLD	7.9	315	2.84	2	Normal	Good	2.5	Low	SF3B1, DNMT3A, TET2, NF1	WT
59	59	M	MDS-IB1	9.2	107	N/A	7	Normal	Good	4.5	Intermediate	SF3B1, DNMT3A, TET2	WT
60	65	M	MDS-MLD	11.1	166	2.85	1	Normal	Good	1.0	Very Low	SF3B1, DNMT3A	WT
61	81	M	MDS-TP53-Bi	10.7	158	1.70	2	N/A	N/A	N/A	N/A	TP53, NF1	LOH (VAF 80.0%)
62	31	M	MDS-MLD	9.2	163	0.83	0	Normal	Good	2.0	Low	U2AF1, CBL	WT
64	77	F	MDS-TP53-Bi	10.6	336	5.82	2	N/A	N/A	N/A	N/A	SF3B1, TP53, TET2	LOH (VAF 99.0%)
65	81	F	MDS-MLD	8.2	130	1.17	0	N/A	N/A	N/A	N/A	ASXL1, SRSF2, TET2	WT
66	86	F	MDS-MLD	10.1	276	1.30	0	N/A	N/A	N/A	N/A	SF3B1, TET2	WT
67	38	F	MDS-SLD	12.2	115	1.18	1	N/A	N/A	N/A	N/A	ASXL1, RUNX1	WT
68	60	F	MDS-IB1	10.3	110	10.84	6	Normal	Good	3.0	Low	DNMT3A, TET2, STAG2	WT
69	56	F	MDS-MLD	7.2	5	N/A	N/A	8 kazanımı	Intermediate	N/A	N/A	TP53, RUNX1, SRSF2, DNMT3A, NF1, KRAS	Single-hit (VAF 1.15%)
70	75	F	MDS-TP53-Bi	9.6	80	2.69	3	5qdel	Good	3.5	Intermediate	TP53, NF1	Multihit (biallelic)
71	66	F	MDS-TP53-Bi	9.6	52.2	5.06	5	Normal	Good	4.5	Intermediate	TP53, ASXL1, EZH2	LOH (VAF 78.0%)
