# Supplementary material
Source: Research Square preprint supplement (doi:10.21203/rs.3.rs-9569530/v1)
Supplement: Supplementary file 2 [file 90386a9b257d0314019bed60.xlsx]

## Sheet: Supplementary Table S1
Case#	Disease_Group	Age	Sex	Blast%	Ring_Sideroblasts%	WHO_2022	ICC_2022	Concordant	Discordance_Type	TP53	SF3B1	TET2	ASXL1	SRSF2	JAK2	KRAS	DNMT3A	NF1	EZH2	Total_Mutations_40gene
1	CMML	44	Male	0	0	KMML-2	KMML-2	Yes					Mut	Mut						6
2	CMML	62	Female	4	0	KMML-1	KMML-1	Yes				Mut	Mut							6
3	CMML	74	Male	5	0	KMML-2	KMML-2	Yes					Mut	Mut	Mut			Mut		7
4	CMML	67	Male	0	0	KMML-1	KMML-1	Yes				Mut	Mut	Mut						5
5	CMML	65	Female			KMML-1	KMML-1	Yes								Mut	Mut			4
6	CMML	66	Male	15	0	KMML-2	KMML-2	Yes				Mut		Mut						5
7	CMML	66	Female	4	0	KMML-1	KMML-1	Yes				Mut	Mut	Mut		Mut				6
8	CMML	80	Female	0	0	KMML-1	KMML-1	Yes									Mut			4
9	CMML	72	Male	0		KMML-1	KMML-1	Yes				Mut								4
10	CMML	54	Male	0		KMML-1	KMML-1	Yes				Mut		Mut						5
11	CMML	74	Male	4	0	KMML-1	KMML-1	Yes				Mut	Mut						Mut	5
12	CMML	60	Female	8	0	KMML-2	KMML-2	Yes				Mut	Mut	Mut						5
13	CMML	57	Female	0		KMML-1	KMML-1	Yes				Mut							Mut	4
14	CMML	50	Male	5		KMML-1	KMML-1	Yes						Mut		Mut			Mut	5
15	CMML	45	Female	0		KMML-1	KMML-1	Yes						Mut			Mut			6
16	CMML	74	Male	9		KMML-2	KMML-2	Yes				Mut		Mut	Mut	Mut				10
17	CMML	62	Female	0		KMML-1	KMML-1	Yes				Mut		Mut						12
18	CMML	69	Male	7		KMML-1	KMML-1	Yes				Mut		Mut					Mut	5
19	CMML	66	Male	13	0	KMML-2	KMML-2	Yes				Mut		Mut						3
20	CMML	82	Male	3		KMML-1	KMML-1	Yes				Mut	Mut	Mut				Mut		6
21	CMML	63	Male	10		KMML-2	KMML-2	Yes				Mut	Mut				Mut	Mut		12
22	CMML	54	Male	0	0	KMML-1	KMML-1	Yes				Mut	Mut					Mut	Mut	6
23	MDS	75	Female	0		MDS-MLD	MDS-MLD	Yes									Mut			3
24	MDS/MPN	68	Male		0	MDS/MPN, NOS	MDS/MPN, NOS	Yes				Mut		Mut	Mut					6
25	MDS/MPN	55	Male	2	27	MDS/MPN-T-SF3B1	MDS/MPN-T-SF3B1	Yes			Mut									4
26	MDS/MPN	55	Male	0	15	MDS/MPN-T-SF3B1	MDS/MPN-T-SF3B1	Yes			Mut				Mut					5
27	MDS/MPN	75	Female	0	0	MDS/MPN, NOS	MDS/MPN, NOS	Yes				Mut				Mut				7
28	MDS/MPN	63	Female	5	21	MDS/MPN, NOS	MDS/MPN, NOS	Yes					Mut					Mut		7
29	MDS/MPN	64	Male			MDS/MPN, NOS	MDS/MPN, NOS	Yes					Mut		Mut	Mut		Mut		5
30	MDS/MPN	64	Male			MDS/MPN, NOS	MDS/MPN, NOS	Yes					Mut		Mut	Mut				6
31	MDS/MPN	71	Male	8	0	MDS/MPN, NOS	MDS/MPN, NOS	Yes					Mut			Mut				5
32	CMML	43	Male	1	0	KMML-1	KMML-1	Yes				Mut						Mut		8
33	MDS/MPN	76	Male	0	31	MDS/MPN, NOS	MDS/MPN, NOS	Yes			Mut		Mut				Mut	Mut		8
34	MDS	63	Female	2	46	MDS-RS	MDS-RS	Yes			Mut	Mut							Mut	3
35	MDS	70	Male	2	87	MDS-MLD	MDS-MLD	Yes					Mut					Mut		4
36	MDS	71	Male	0	15	MDS-RS	MDS-TP53	No	TP53-driven	Mut	Mut		Mut				Mut	Mut		6
37	MDS	46	Female	0	75	MDS-RS	MDS-RS	Yes			Mut							Mut		4
38	MDS	68	Male	10	15	MDS-MLD	MDS-MLD	Yes									Mut		Mut	6
39	MDS	30	Male	12	18	MDS-RS	MDS-RS	Yes			Mut									4
40	MDS	47	Male	2	2	MDS-MLD	MDS-MLD	Yes												3
41	CMML	70	Male	0		KMML-1	KMML-1	Yes				Mut		Mut						5
42	MDS	79	Female	0	0	MDS-MLD	MDS-MLD	Yes					Mut							6
43	CMML	53	Male	5	0	KMML-1	KMML-1	Yes				Mut	Mut						Mut	7
44	MDS	79	Female	3	0	MDS-MLD	MDS-MLD	Yes				Mut								4
45	MDS	64	Male	0	7	MDS-SLD	MDS-SLD	Yes									Mut			4
46	MDS	72	Female	14		MDS-MLD	MDS-MLD	Yes					Mut							4
47	MDS	29	Male	0	18	MDS-RS	MDS-RS	Yes				Mut								3
48	MDS	68	Male			MDS-LB	MDS-TP53	No	TP53-driven	Mut								Mut		2
49	MDS	57	Female	10	21	MDS-TP53-Bi	MDS-TP53-Bi	Yes		Mut										3
50	MDS	27	Female	2		MDS-MLD	MDS-TP53	No	TP53-driven	Mut							Mut		Mut	6
51	MDS	82	Female	6		MDS-IB1	MDS-IB	No	Nomenclature (IB1/IB)		Mut								Mut	5
52	MDS	23	Male	2	0	MDS-MLD	MDS-MLD	Yes												5
53	MDS	71	Female	0	15	MDS-RS	MDS-RS	Yes			Mut									3
54	MDS/MPN	66	Male	2	6	MDS/MPN, NOS	MDS/MPN, NOS	Yes					Mut	Mut	Mut					8
55	MDS	71	Male	1	50	MDS-RS	MDS-RS	Yes			Mut	Mut								4
56	MDS/MPN	74	Male	7	66	MDS/MPN, NOS	MDS/MPN, NOS	Yes							Mut		Mut	Mut		7
57	MDS	65	Female	5	10	MDS-IB1	MDS-TP53	No	TP53-driven	Mut	Mut	Mut								4
58	MDS	69	Female	2	25	MDS-MLD	MDS-MLD	Yes			Mut	Mut					Mut	Mut		9
59	MDS	59	Male	7	46	MDS-IB1	MDS-IB	No	Nomenclature (IB1/IB)		Mut	Mut					Mut			3
60	MDS	65	Male	1	36	MDS-MLD	MDS-MLD	Yes			Mut						Mut			6
61	MDS	81	Male	2	0	MDS-TP53-Bi	MDS-TP53-Bi	Yes		Mut								Mut		3
62	MDS	31	Male	0	7	MDS-MLD	MDS-MLD	Yes												5
63	MDS/MPN	61	Male	4	30	MDS/MPN-T-SF3B1	MDS/MPN-T-SF3B1	Yes			Mut		Mut		Mut			Mut		14
64	MDS	77	Female	2	76	MDS-TP53-Bi	MDS-TP53-Bi	Yes		Mut	Mut	Mut								7
65	MDS	81	Female	0	18	MDS-MLD	MDS-MLD	Yes				Mut	Mut	Mut						5
66	MDS	86	Female	0	20	MDS-MLD	MDS-MLD	Yes			Mut	Mut								4
67	MDS	38	Female	1		MDS-SLD	MDS-SLD	Yes					Mut							3
68	MDS	60	Female	6	34	MDS-IB1	MDS-IB	No	Nomenclature (IB1/IB)			Mut					Mut			5
69	MDS	56	Female		0	MDS-MLD	MDS-TP53	No	TP53-driven	Mut				Mut		Mut	Mut	Mut		6
70	MDS	75	Female	3	12	MDS-TP53-Bi	MDS-TP53-Bi	Yes		Mut								Mut		4
71	MDS	66	Female	5	6	MDS-TP53-Bi	MDS-TP53-Bi	Yes		Mut			Mut						Mut	5
