# Supplementary material
Source: Research Square preprint supplement (doi:10.21203/rs.3.rs-9569530/v1)
Supplement: Supplementary file 3 [file 928767be8ac15bd457035727.xlsx]

## Sheet: Table S5 - BM Morphology
Supplementary Table S5. Bone Marrow Morphology Findings
Feature	MDS (n=34)	CMML (n=25)	MDS/MPN (n=12)	p value
Cellularity %, median (IQR)	83.0 (70–95)	94.8 (90–100)	95.8 (92–100)	0.002
Reticulin fibrosis ≥2, n (%)	10/32 (31.2%)	8/25 (32.0%)	9/12 (75.0%)	0.015
Ring sideroblasts present, n (%)	23/34 (67.6%)	0/25 (0%)	7/12 (58.3%)	<0.001
Ring sideroblasts ≥15%, n (%)	15/34 (44.1%)	0/25 (0%)	5/12 (41.7%)	<0.001
BM blasts %, median (range)	3.0 (0–15)	5.0 (1–18)	2.0 (0–8)	0.187
BM monocytes %, mean (SD)	1.7 (1.2)	8.8 (4.5)	3.1 (2.0)	<0.001

## Sheet: Table S6 - PB Findings
Supplementary Table S6. Peripheral Blood Findings
Feature	MDS (n=34)	CMML (n=25)	MDS/MPN (n=12)	p value
PB monocytes %, mean (SD)	3.2 (2.1)	18.5 (8.2)	5.8 (3.5)	<0.001
PB monocytes ×10⁹/L, median (IQR)	0.3 (0.1–0.5)	2.8 (1.5–5.2)	0.8 (0.3–1.5)	<0.001
PB blasts %, median (range)	0 (0–5)	1 (0–8)	0 (0–3)	0.125

## Sheet: Table S7 - Mutations
Supplementary Table S7. Mutation Landscape by Disease Group
Gene	MDS (n=34)	CMML (n=25)	MDS/MPN (n=12)
SF3B1	13 (38.2%)	0 (0%)	5 (41.7%)
TET2	11 (32.4%)	19 (76.0%)	4 (33.3%)
TP53	10 (29.4%)	0 (0%)	0 (0%)
DNMT3A	10 (29.4%)	5 (20.0%)	2 (16.7%)
ASXL1	8 (23.5%)	11 (44.0%)	7 (58.3%)
SRSF2	5 (14.7%)	15 (60.0%)	3 (25.0%)
RUNX1	5 (14.7%)	4 (16.0%)	2 (16.7%)
JAK2	0 (0%)	0 (0%)	7 (58.3%)
U2AF1	4 (11.8%)	2 (8.0%)	1 (8.3%)
STAG2	4 (11.8%)	1 (4.0%)	0 (0%)
EZH2	3 (8.8%)	3 (12.0%)	2 (16.7%)
IDH1/2	3 (8.8%)	2 (8.0%)	1 (8.3%)
NRAS	2 (5.9%)	5 (20.0%)	1 (8.3%)
KRAS	1 (2.9%)	4 (16.0%)	2 (16.7%)
CBL	0 (0%)	3 (12.0%)	2 (16.7%)
SETBP1	0 (0%)	2 (8.0%)	3 (25.0%)
ZRSR2	2 (5.9%)	1 (4.0%)	0 (0%)
BCOR	2 (5.9%)	1 (4.0%)	1 (8.3%)
PHF6	1 (2.9%)	1 (4.0%)	0 (0%)
FLT3	1 (2.9%)	0 (0%)	0 (0%)
Mutations detected by targeted next-generation sequencing (40-gene myeloid panel). Only pathogenic/likely pathogenic variants with VAF ≥2% are reported. Gene names are listed in descending order of frequency across the entire cohort.
