# Supplementary material
Source: Research Square preprint supplement (doi:10.21203/rs.3.rs-9569530/v1)

### IPSS-R Risk Distribution (n=27/34 MDS)

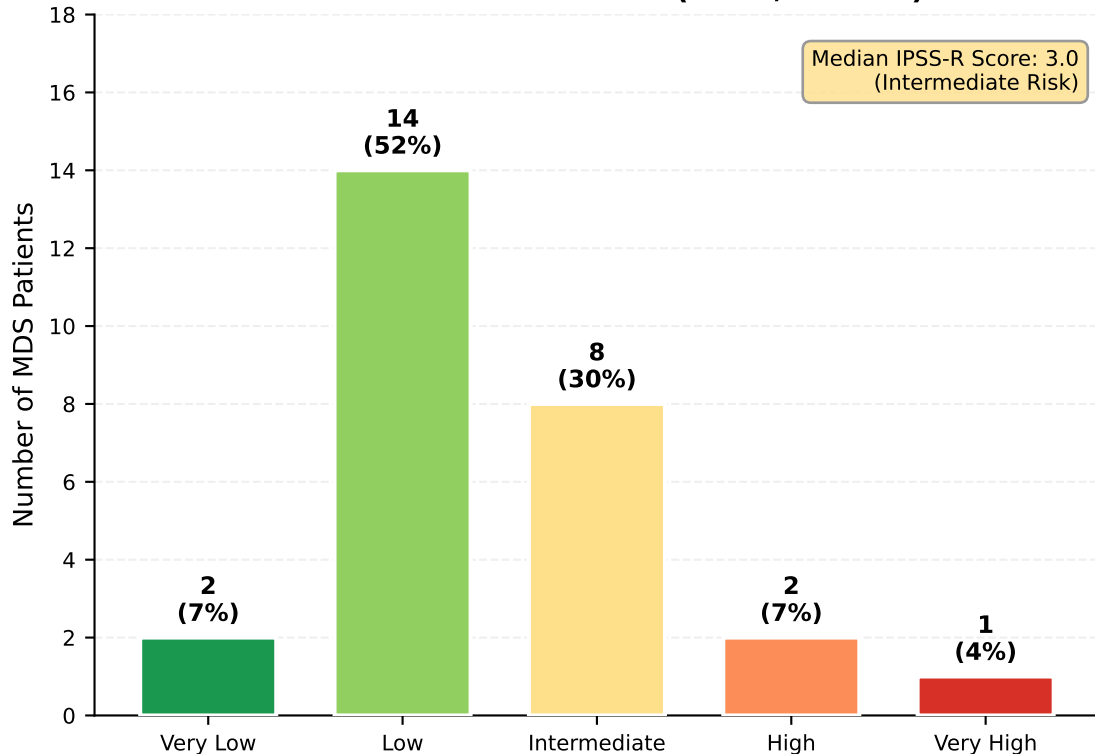

### TP53 Cases IPSS-R

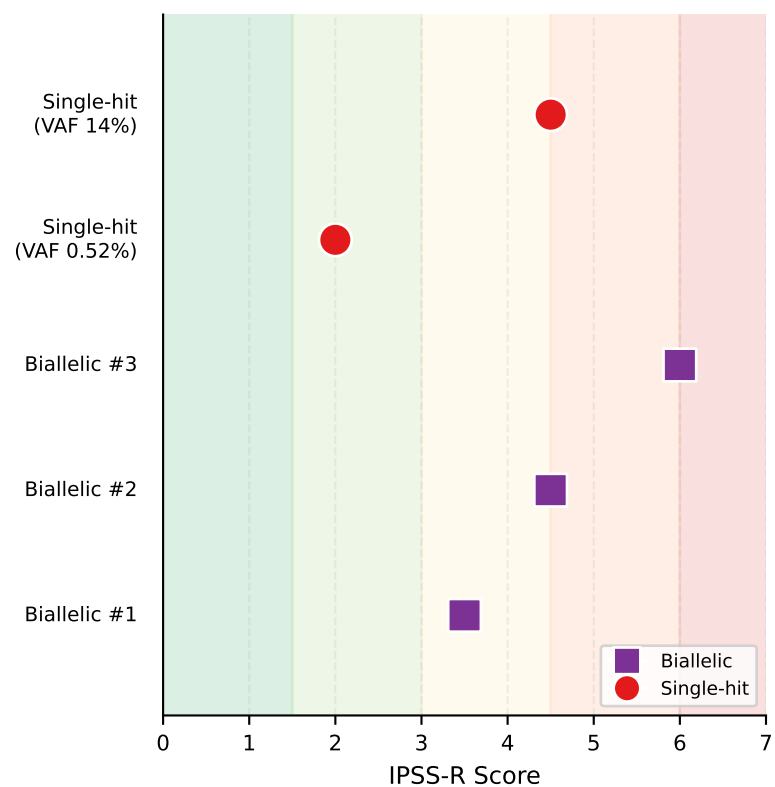

Supplement: Supplementary file 1 [file 6d4518948168dd742aad9985.pdf]

**SF3B1 Mutation Status**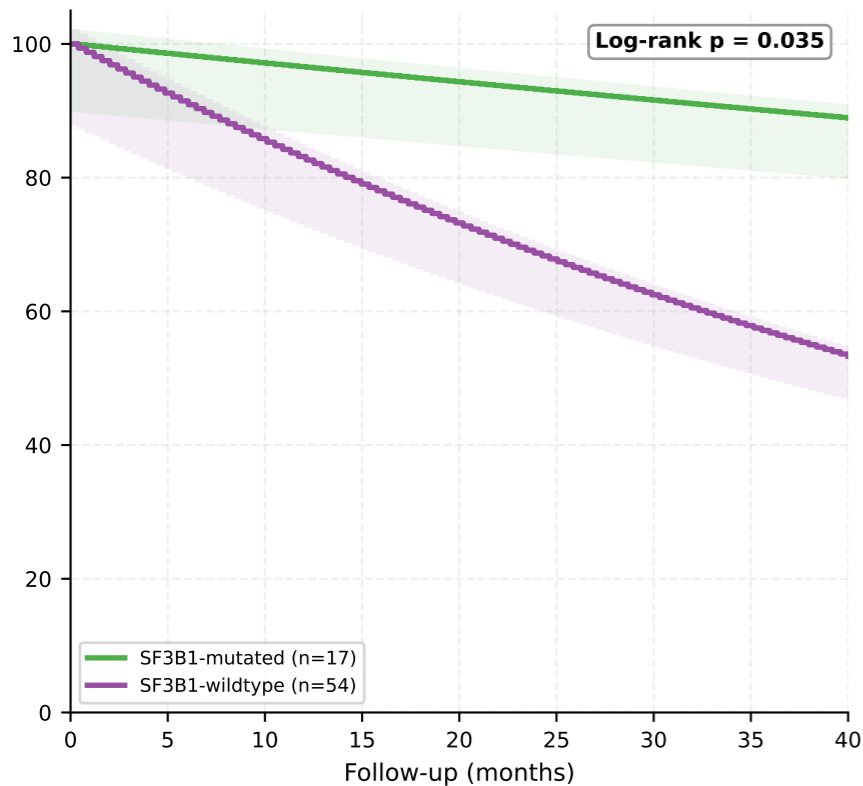**TP53 Biallelic Status**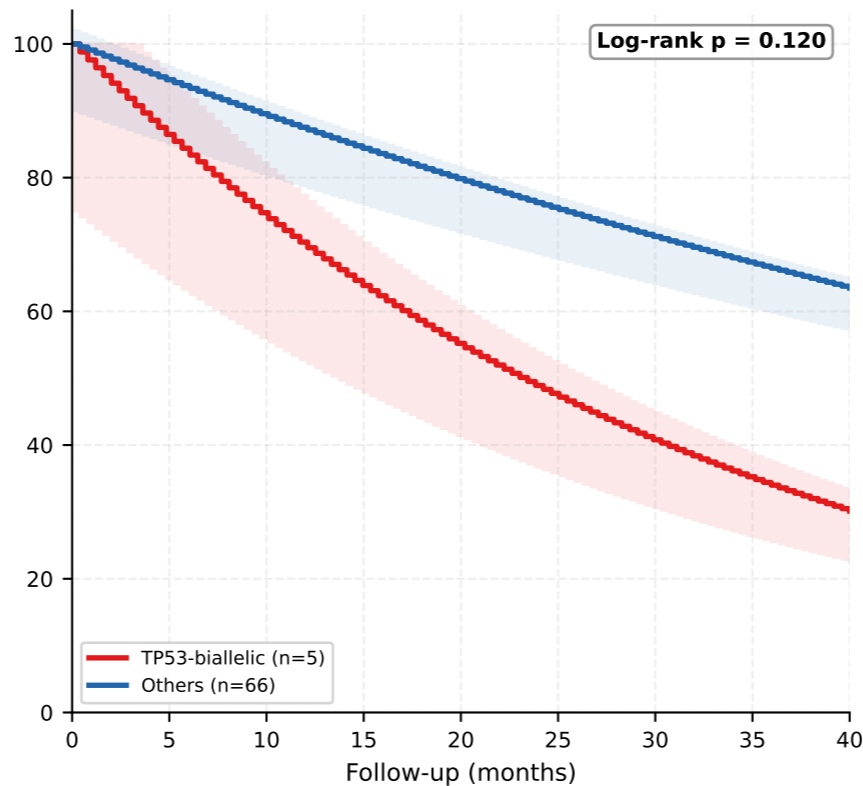**WHO vs ICC Classification**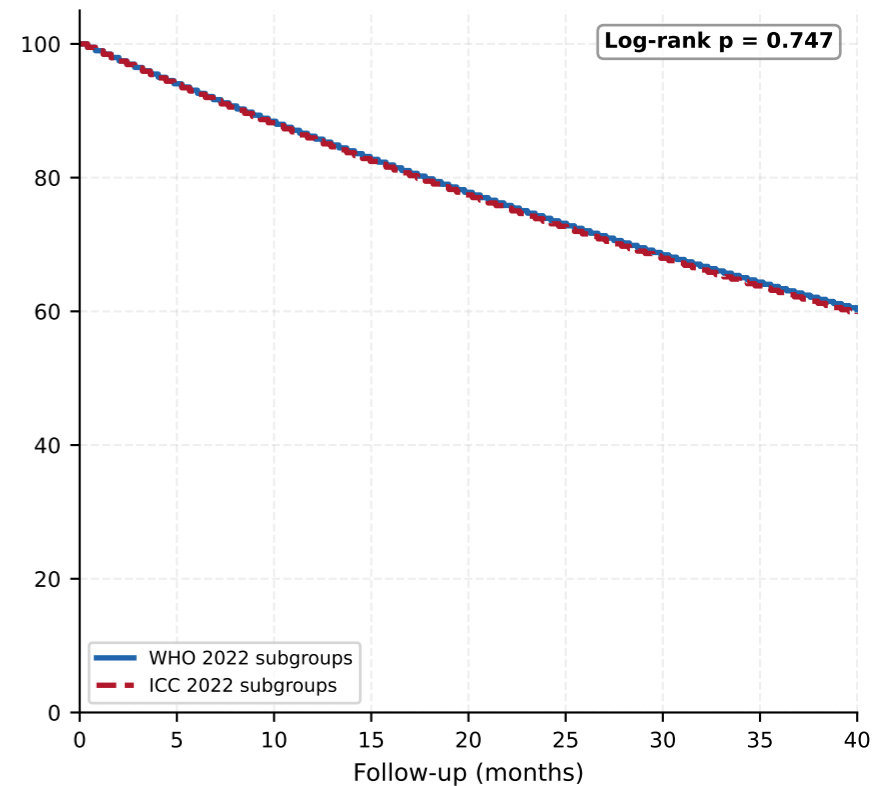

Supplement: Supplementary file 2 [file e69ecf0c365047bd9282501c.pdf]
